**Codebook for the database analyzed for the manuscript “Work ability during the COVID-19 pandemic: a cross-sectional study in a low-income urban setting in Brazil”**

| #  | Variable                      | Description                                                                                                    | Labels                                                                                                           |
|----|-------------------------------|----------------------------------------------------------------------------------------------------------------|------------------------------------------------------------------------------------------------------------------|
| 1  | [part_id]                     | Study participant identification number                                                                        |                                                                                                                  |
| 2  | [Sexo]                        | Participant's gender                                                                                           | 1=Female<br>2=Male                                                                                               |
| 3  | [Age_group]                   | Age categorized                                                                                                | 1 = <45: Individuals who are younger than 45 years old.<br>2 = >=45: Individuals who are 45 years old or older.  |
| 4  | [RaceSkin_color_group]        | Race/color categorized                                                                                         | 1=Black<br>2=White, mixed, other                                                                                 |
| 5  | [Schooling_Group]             | Years of education                                                                                             | 1=Up to 8 years of study<br>2=9 to 11 years of study<br>3=12 to 15 years of study<br>4=16 years or more of study |
| 6  | [Marital_status_Group]        | Grouped marital status                                                                                         | 1=Single<br>2=Married or living with a partner<br>3=Separated or widowed                                         |
| 7  | [Marital_status_Group2]       | Grouped marital status                                                                                         | 1=Not married or living with a partner<br>2=Married or living with a partner                                     |
| 8  | [Young_apprentice]            | Self-reported working as a Young Apprentice                                                                    | 1=Yes 0=No                                                                                                       |
| 9  | [Body_mass_index]             | BMI classification                                                                                             | 1=Underweight<br>2=Normal weight<br>3=Overweight<br>4=Obesity                                                    |
| 10 | [Hypertension]                | Self-reported hypertension                                                                                     | 1=Yes 0=No                                                                                                       |
| 11 | [Diabetes]                    | Self-reported diabetes                                                                                         | 1=Yes 0=No                                                                                                       |
| 12 | [Smoker]                      | Self-reported smoker                                                                                           | 1=Yes 0=No                                                                                                       |
| 13 | [COVID19_illness]             | Self-reported COVID-19                                                                                         | 1=Yes 0=No                                                                                                       |
| 14 | [COVID19_illness_hosp]        | Self-reported hospitalization due to COVID-19                                                                  | 1=Yes 0=No                                                                                                       |
| 15 | [COVID19_vaccination]         | Self-reported vaccination against covid-19                                                                     | 1=Yes 0=No                                                                                                       |
| 16 | [Self_assessment_health]      | Self health assessment                                                                                         | 1=Excellent or very good<br>2=Good or Moderate<br>3=Bad or very bad                                              |
| 17 | [Working]                     | Self-reported if currently working or carrying out some financially remunerated activity                       | 1=Yes 0=No                                                                                                       |
| 18 | [Number_of_works]             | Self-reported having more than one financially remunerated job or activity                                     | 0=Only one work/occupation<br>1=More than one work/occupation                                                    |
| 19 | [Being_retired_work]          | Self-reported being retired and working                                                                        | 1=Yes 0=No                                                                                                       |
| 20 | [Bolsa_familia]               | Self-reported receiving the "Bolsa Família"                                                                    | 1=Yes 0=No                                                                                                       |
| 21 | [Pandemic_Emergency_Aid_2020] | Self-reported receiving the COVID-19 emergency aid, 2020                                                       | 1=Yes 0=No                                                                                                       |
| 22 | [Pandemic_Emergency_Aid_2021] | Self-reported receiving the COVID-19 emergency aid, 2021                                                       | 1=Yes 0=No                                                                                                       |
| 23 | [trab_pand]                   | Same work as at the beginning of the pandemic                                                                  | 1=Yes 0=No                                                                                                       |
| 24 | [trab_perda]                  | Lost your job or stopped carrying out any paid activity during the pandemic                                    | 1=Yes 0=No                                                                                                       |
| 25 | [sem_trab2__1]                | Self-referred reason for not working: Due to the pandemic (isolation, quarantine or social distancing)         | 1=Yes 0=No                                                                                                       |
| 26 | [sem_trab2__2]                | Self-referred reason for not working: Due to health problems or pregnancy                                      | 1=Yes 0=No                                                                                                       |
| 27 | [sem_trab2__3]                | Self-referred reason for not working: Just study                                                               | 1=Yes 0=No                                                                                                       |
| 28 | [sem_trab2__4]                | Self-referred reason for not working: Don't want to work or are retired                                        | 1=Yes 0=No                                                                                                       |
| 29 | [sem_trab2__5]                | Self-referred reason for not working: No experience or qualifications                                          | 1=Yes 0=No                                                                                                       |
| 30 | [sem_trab2__6]                | Self-referred reason for not working: Won't find a job because he's too young or old                           | 1=Yes 0=No                                                                                                       |
| 31 | [sem_trab2__7]                | Self-referred reason for not working: Can't find work in the region                                            | 1=Yes 0=No                                                                                                       |
| 32 | [sem_trab2__8]                | Self-referred reason for not working: You have to take care of household chores and/or family chores           | 1=Yes 0=No                                                                                                       |
| 33 | [sem_trab2__9]                | Self-referred reason for not working: Waiting for a response to get a job                                      | 1=Yes 0=No                                                                                                       |
| 34 | [sem_trab2__10]               | Self-referred reason for not working: Gave up looking for work                                                 | 1=Yes 0=No                                                                                                       |
| 35 | [sem_trab2__11]               | Self-referred reason for not working: Another reason                                                           | 1=Yes 0=No                                                                                                       |
| 36 | [Weekly_workload]             | Classification of weekly working hours                                                                         | 1=Up to 40 hours per week<br>2=More than 40 hours per week                                                       |
| 37 | [Work_contract_status]        | Classification according to Work contract status                                                               | 1=Informal Work<br>2=Formal Work                                                                                 |
| 38 | [Work_from_home]              | The work or paid activity is outside the home                                                                  | 1=No, I only work from home. 0=Yes                                                                               |
| 39 | [ocup_1]                      | Cleaning Sector = Domestic worker, day laborer, cook (in private households)                                   | 1=Yes 0=No                                                                                                       |
| 40 | [ocup_2]                      | Cleaning = Cleaner, cleaning assistant, etc. (in public or private companies)                                  | 1=Yes 0=No                                                                                                       |
| 41 | [ocup_3]                      | Administrative services = Office assistant, clerk                                                              | 1=Yes 0=No                                                                                                       |
| 42 | [ocup_4]                      | Administrative services = Secretary, receptionist                                                              | 1=Yes 0=No                                                                                                       |
| 43 | [ocup_5]                      | Commerce = Telemarketing operator                                                                              | 1=Yes 0=No                                                                                                       |
| 44 | [ocup_6]                      | Commerce = Merchant (bar owner, shop owner, etc.)                                                              | 1=Yes 0=No                                                                                                       |
| 45 | [ocup_7]                      | Commerce = Shop clerk, store seller                                                                            | 1=Yes 0=No                                                                                                       |
| 46 | [ocup_8]                      | Commerce = Door-to-door seller, sales representative, catalog seller (Avon, Natura, etc.)                      | 1=Yes 0=No                                                                                                       |
| 47 | [ocup_9]                      | Commerce = Street vendor (market seller, street vendor, kiosk vendor)                                          | 1=Yes 0=No                                                                                                       |
| 48 | [ocup_10]                     | Food services = Cook and waiter (in restaurants, businesses)                                                   | 1=Yes 0=No                                                                                                       |
| 49 | [ocup_11]                     | Food services = Baker, butcher, pastry chef                                                                    | 1=Yes 0=No                                                                                                       |
| 50 | [ocup_14]                     | Delivery and transportation = Driver (app driver, taxi driver, van driver, motorcycle taxi driver, bus driver) | 1=Yes 0=No                                                                                                       |

**Codebook for the database analyzed for the manuscript “Work ability during the COVID-19 pandemic: a cross-sectional study in a low-income urban setting in Brazil”**

| #  | Variable         | Description                                                                                                | Labels                                                                                                      |
|----|------------------|------------------------------------------------------------------------------------------------------------|-------------------------------------------------------------------------------------------------------------|
| 51 | [ocup_16]        | Delivery and transportation = Motoboy                                                                      | 1=Yes 0=No                                                                                                  |
| 52 | [ocup_17]        | Delivery and transportation = Delivery person (restaurant, pharmacy, store, Uber Eats, IFood, Rappi, etc.) | 1=Yes 0=No                                                                                                  |
| 53 | [ocup_19]        | Industry = Vehicle mechanic, industrial machine mechanic, etc.                                             | 1=Yes 0=No                                                                                                  |
| 54 | [ocup_20]        | Beauty and clothing = Artisan, seamstress, and shoemaker                                                   | 1=Yes 0=No                                                                                                  |
| 55 | [ocup_21]        | Beauty and clothing = Hairdresser, manicurist, and similar professions                                     | 1=Yes 0=No                                                                                                  |
| 56 | [ocup_23]        | Industry = Production assistant, loading and unloading assistant                                           | 1=Yes 0=No                                                                                                  |
| 57 | [ocup_24]        | Education = Preschool teacher, elementary, middle, or high school teacher                                  | 1=Yes 0=No                                                                                                  |
| 58 | [ocup_25]        | Education = Pedagogue, language, music, art, and tutoring teacher                                          | 1=Yes 0=No                                                                                                  |
| 59 | [ocup_26]        | Health = Doctor, nurse, higher-level health professionals                                                  | 1=Yes 0=No                                                                                                  |
| 60 | [ocup_27]        | Health = Technician, mid-level health professional                                                         | 1=Yes 0=No                                                                                                  |
| 61 | [ocup_28]        | Health = Caregiver for children, sick, or elderly individuals                                              | 1=Yes 0=No                                                                                                  |
| 62 | [ocup_29]        | Security = Security guard, watchman, other protection service worker                                       | 1=Yes 0=No                                                                                                  |
| 63 | [ocup_31]        | Security = Doorman, janitor                                                                                | 1=Yes 0=No                                                                                                  |
| 64 | [ocup_32]        | Other sectors = Artist, religious leader (priest, pastor, etc.)                                            | 1=Yes 0=No                                                                                                  |
| 65 | [ocup_34]        | Other sectors = Other higher-level professions (lawyer, engineer, accountant, journalist, etc.)            | 1=Yes 0=No                                                                                                  |
| 66 | [ocup_35]        | Other sectors = Other mid-level technicians or professionals                                               | 1=Yes 0=No                                                                                                  |
| 67 | [ocup_36]        | Other sectors = Other                                                                                      | 1=Yes 0=No                                                                                                  |
| 68 | [rm_pand]        | Self-reported whether there was a change in income during the pandemic                                     | 1=Yes 0=No                                                                                                  |
| 69 | [rm_pand2]       | If there was a change in income, did it increase or decrease                                               | 1=Decreased 2=Increased                                                                                     |
| 70 | [Income_r\$]     | Self-referred income in BRL                                                                                |                                                                                                             |
| 71 | [Monthly_income] | Monthly income                                                                                             | 1=Up to USD 210<br>2=More than USD 210                                                                      |
| 72 | [risk_COVID19]   | Work-related risk of exposure to SARS-CoV-2                                                                | 1=very high risk 2=high risk 3=medium risk 4=low risk                                                       |
| 73 | [WAI]            | Work Ability Index                                                                                         |                                                                                                             |
| 74 | [WAI_bi]         | Work Ability Index - Dichotomized                                                                          | 1=inadequate work ability - WAI ranging from 7 to 36<br>2=adequate work ability - WAI ranging from 37 to 49 |
| 75 | [WAI_Group]      | Grouped Work Ability Index                                                                                 | 1=Low (WAI 7-27)<br>2=Moderate (WAI 28-36)<br>3=Good (WAI 37-43)<br>4=Excellent (WAI 44-49)                 |
